# Supplementary material for: Endothelial protein C receptor is overexpressed in colorectal cancer as a result of amplification and hypomethylation of chromosome 20q
Source: PubMed Central journal article supplement (PMC5527318; doi:10.1002/cjp2.70), 2017-07-14
Supplement: CJP2-3-155-s008.pdf [file CJP2-3-155-s008.pdf]

Table S1. Clinico-pathological data for the local colorectal cancer cohort.

| Patient ID | Age | Gender | Tumour site                       | Pathological stage (pMx unless otherwise stated) |
|------------|-----|--------|-----------------------------------|--------------------------------------------------|
| 1514       | 72  | Female | Sigmoid colon                     | pT4 pN1                                          |
| 1515       | 73  | Female | Sigmoid colon                     | pT3 pN0                                          |
| 1516       | 84  | Female | Caecum                            | pT4 pN0                                          |
| 1517       | 57  | Female | Caecum                            | pT2 pN1                                          |
| 1518       | 68  | Female | Rectosigmoid                      | pT3 pN1 pM1                                      |
| 1519       | 72  | Female | Caecum                            | pT3 pN2                                          |
| 1575       | 81  | Female | Sigmoid colon                     | pT3 pN0                                          |
| 1603       | 83  | Female | Ascending colon                   | pT3 pN0                                          |
| 1609       | 50  | Male   | Sigmoid colon                     | pT2 pN0                                          |
| 1634       | 84  | Male   | Sigmoid colon                     | pT4 pN2                                          |
| 1637       | 64  | Male   | Caecum                            | pT3 pN0                                          |
| 1700       | 76  | Male   | Caecum                            | pT4 pN2                                          |
| 1701       | 75  | Male   | Rectum                            | pT3 pN1                                          |
| 1702       | 55  | Male   | Sigmoid colon                     | pT4 pN0                                          |
| 1705       | 53  | Male   | Splenic flexure and sigmoid colon | pT4 pN2                                          |
| 1707       | 75  | Male   | Sigmoid colon                     | pT3 pN0                                          |
| 1713       | 31  | Male   | N/A                               | PT4 pN1                                          |
| 1813       | 72  | Male   | Caecum                            | pT4 pN1                                          |
| 1977       | 66  | Female | Caecum                            | pT2 pN0                                          |
| 1980       | 67  | Female | Sigmoid colon                     | pT2 pN1                                          |
| 1982       | 80  | Male   | Rectum                            | pT3 pN0                                          |
| 1987       | 64  | Male   | Rectum                            | pT3 pN1                                          |
| 1988       | 83  | Female | Caecum                            | pT4 pN1                                          |
| 1990       | 59  | Female | Rectum                            | pT2 pN0                                          |
| 1997       | 82  | Female | Caecum                            | pT2 pN0                                          |
| 2007       | 68  | Male   | Rectum                            | pT3 pN1                                          |
| 2024       | 84  | Female | Rectum                            | pT3 pN1                                          |
| 2042       | 61  | Male   | Rectosigmoid                      | pT4 pN2                                          |
| 2103       | 62  | Male   | Caecum                            | pT4 pN2                                          |
| 2276       | 51  | Male   | Rectosigmoid                      | pT3 pN0                                          |
